# Supplementary material
Source: PubMed Central journal article supplement (PMC7097307)
Supplement: 41592_2011_BFnmeth1703_MOESM306_ESM.pdf [file 41592_2011_BFnmeth1703_MOESM306_ESM.pdf]

## Antiviral restriction factor transgenesis in the domestic cat

Pimprapar Wongsrikeao, Dyana Saenz, Tommy Rinkoski, Takeshige Otoi & Eric Poeschla

|                               |                                                                                              |
|-------------------------------|----------------------------------------------------------------------------------------------|
| <b>Supplementary Figure 1</b> | Lentiviral vectors                                                                           |
| <b>Supplementary Figure 2</b> | Additional animal images and radiographs                                                     |
| <b>Supplementary Figure 3</b> | GFP and rhTRIMcyp expression in PBMCs                                                        |
| <b>Supplementary Figure 4</b> | Additional films and images for whole body analysis.                                         |
| <b>Supplementary Figure 5</b> | rhTRIMcyp expression in whole organs                                                         |
| <b>Supplementary Table 1</b>  | Domestic cat embryo cleavage and blastocyst rates, % transgene expression, effect of timing  |
| <b>Supplementary Table 2</b>  | Transgenic embryo development with single vs dual-gene vectors (all pre-IVF microinjections) |
| <b>Supplementary Table 3</b>  | Vector insertion sites                                                                       |

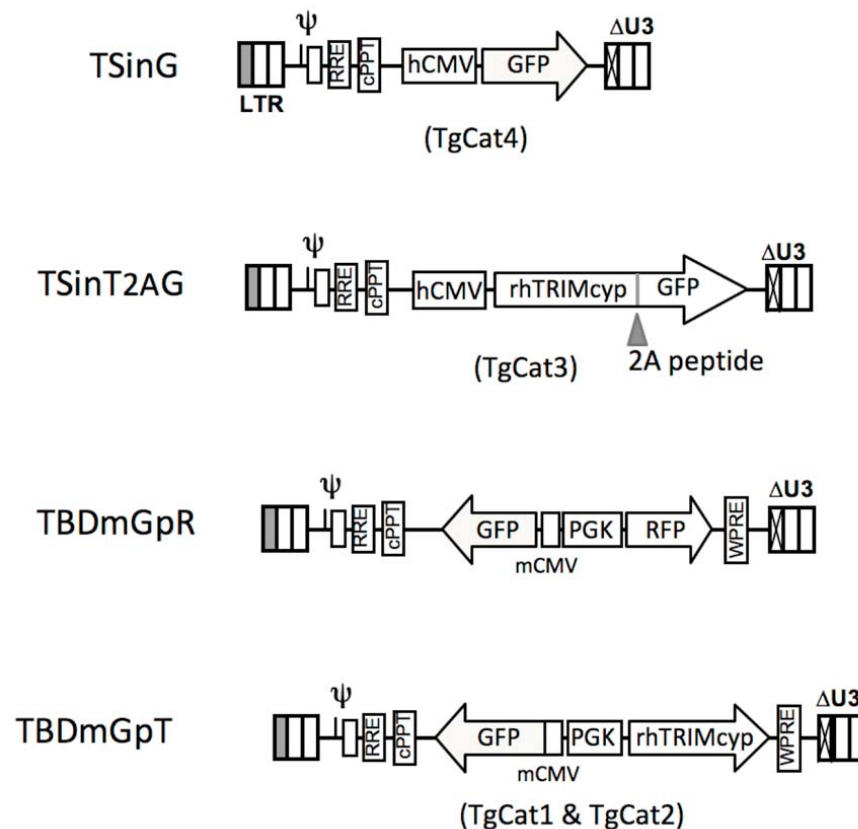

**Supplementary Figure 1. Lentiviral vectors.** TSinG and derivative TSinT2AG both utilize a standard 0.52 Kb internal hCMV promoter. For TSinT2AG, a porcine teschovirus 2A peptide (P2A) mediates expression of both proteins from a single precursor polypeptide. Proper co-translational cleavage at the 2A site was confirmed by immunoblotting. The other two vectors utilize a dual promoter having a minimal (0.16 Kb) hCMV core promoter (mCMV) and a PGK promoter. The four otherwise contain standard transfer vector elements: packaging signal, RRE, WPRE, cPPT-CTS (cPPT); all are U3-deleted ( $\Delta$ U3). See Methods for further details.

2a

Ambient light photos

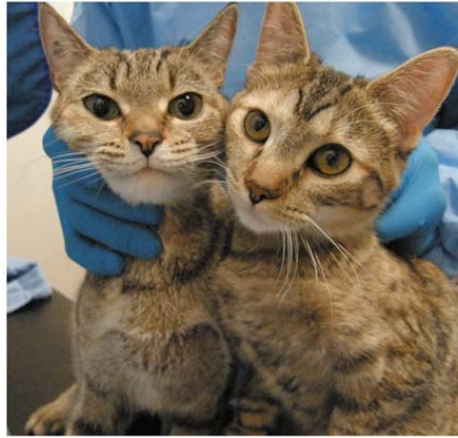

control cat

Tg cat

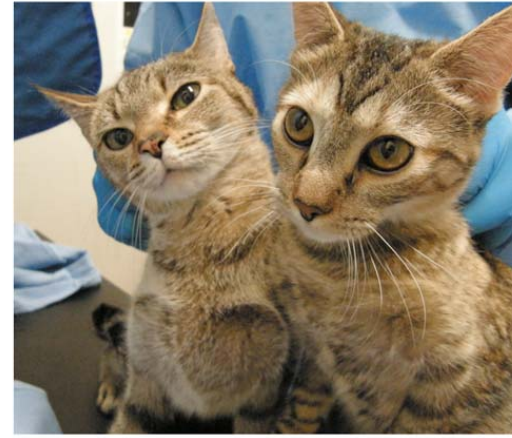

control cat

Tg cat

GFP photos

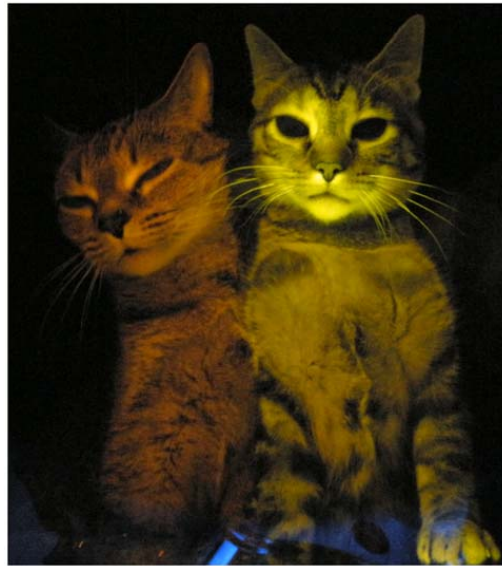

control cat

Tg cat

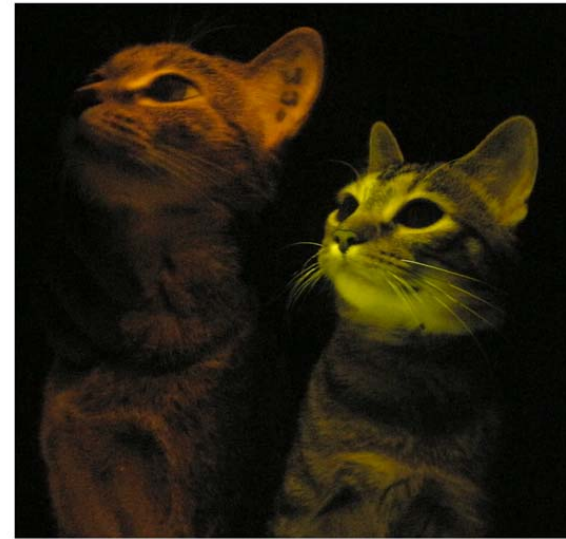

control cat

Tg cat

**Supplementary Figure 2. Additional animal images and radiographs** (panels b-d on subsequent pages).

(a) 5.5 month images corresponding to Fig. 2A, with control and transgenic cat in the same frame.

(b) Simultaneous control cat images for day 2.

(c) Enlargements of the 30 day images in Fig. 2a.

(d) Films were taken on day 45 of a pregnancy that terminated in spontaneous miscarriage 6 days later (term is 61-63 days in this species).

2b

Transgenic cat

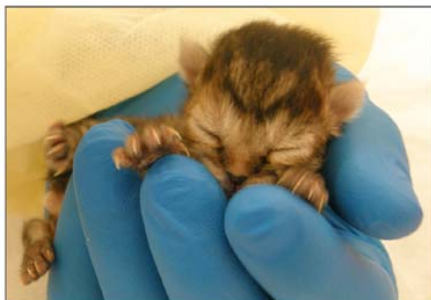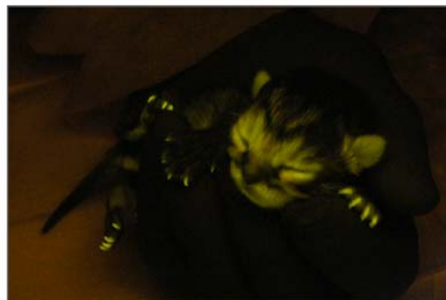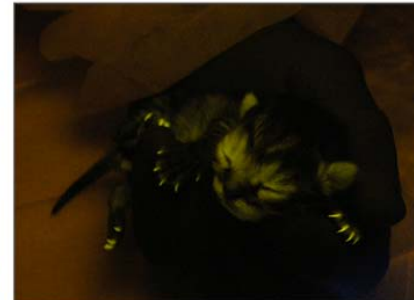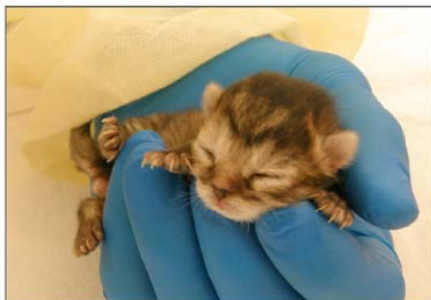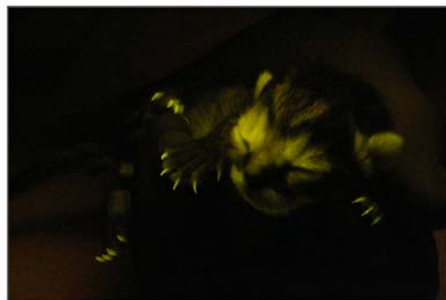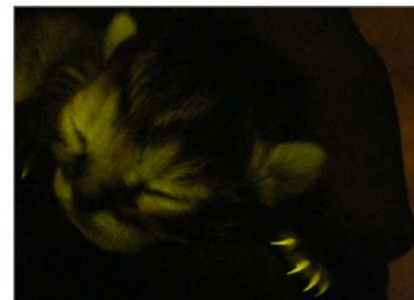

Control cat

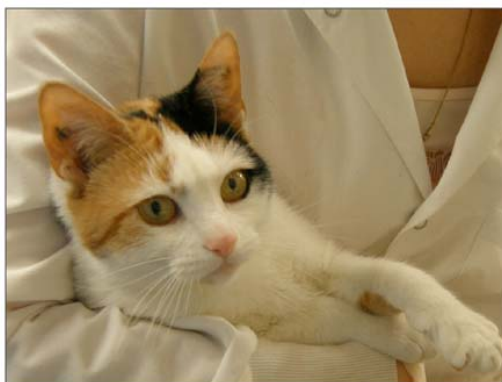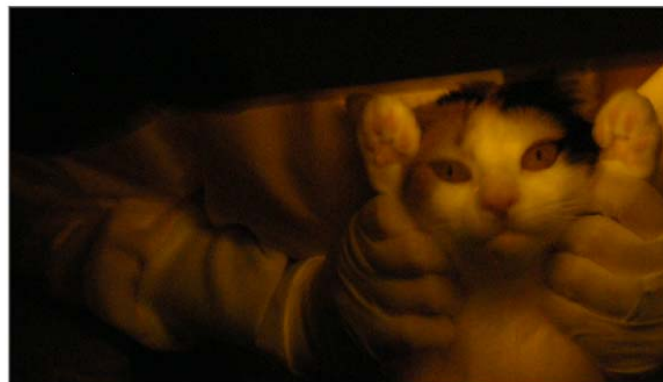



2c

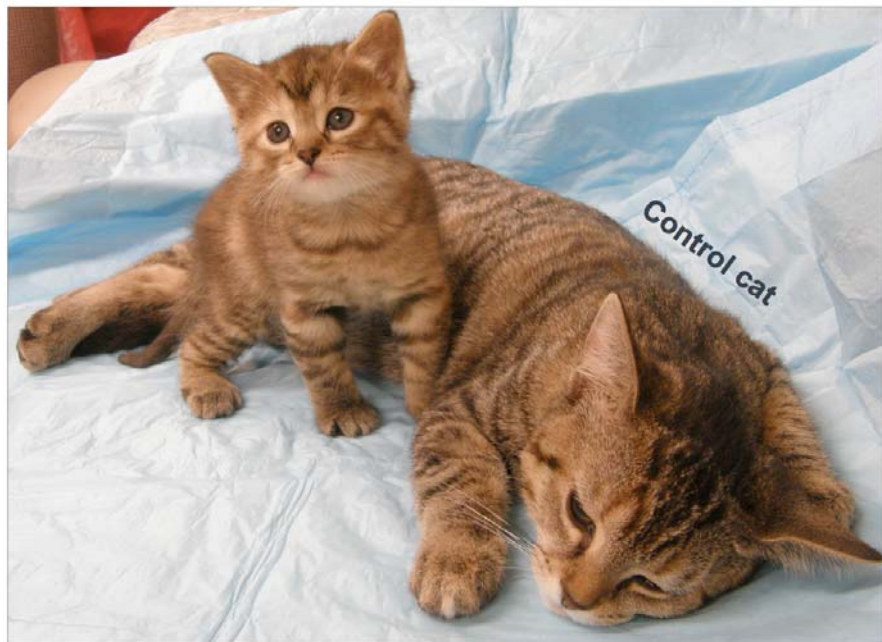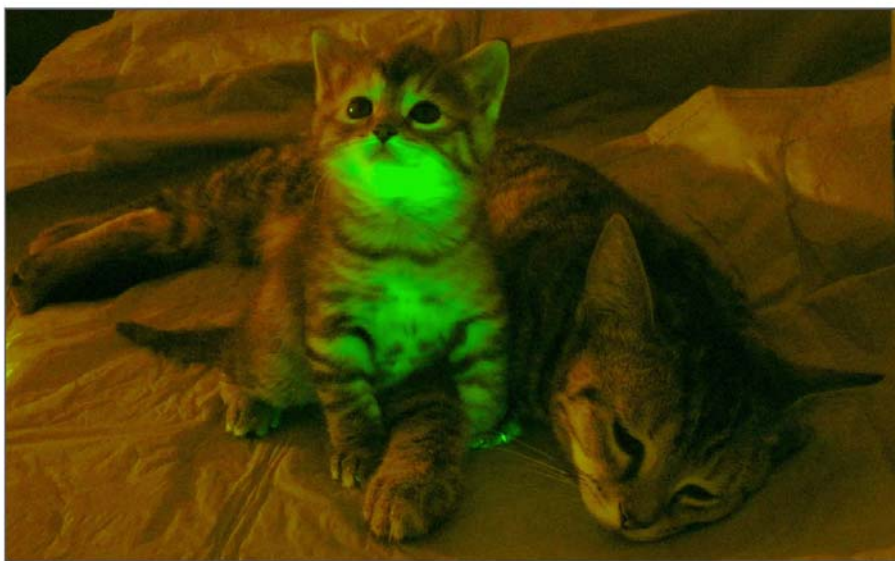

2d

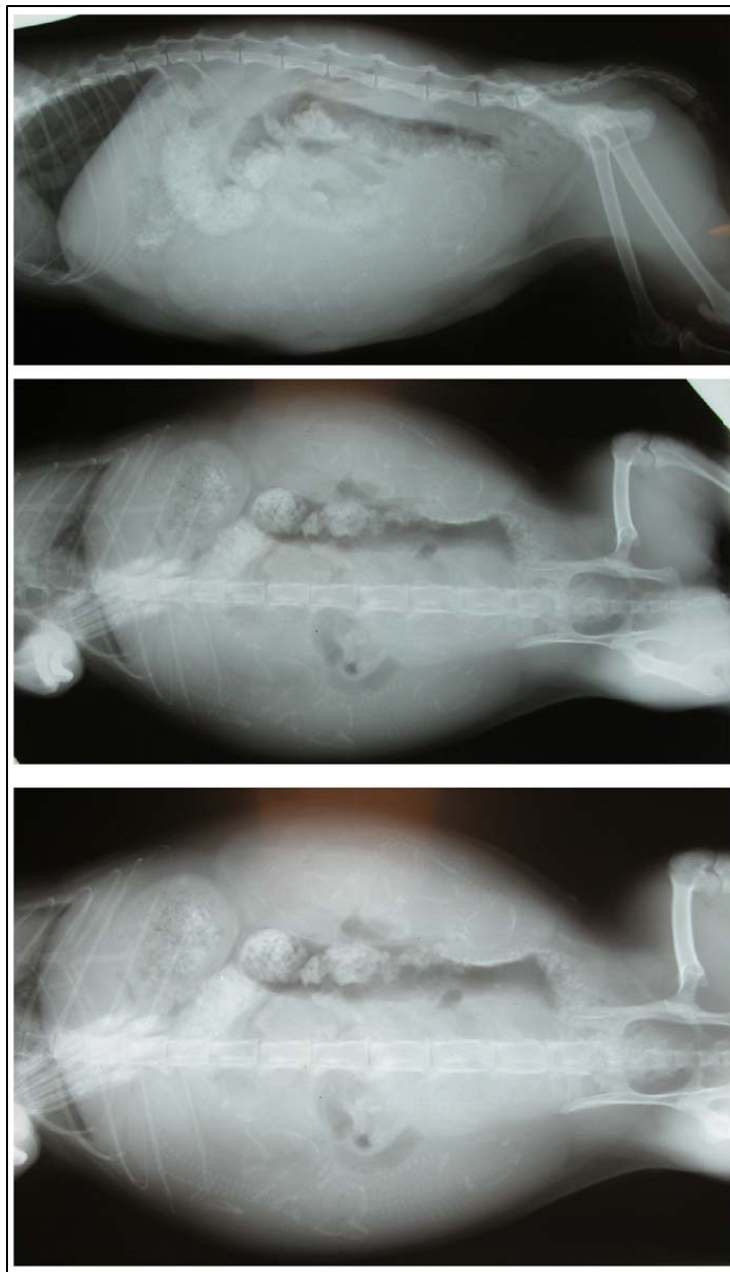

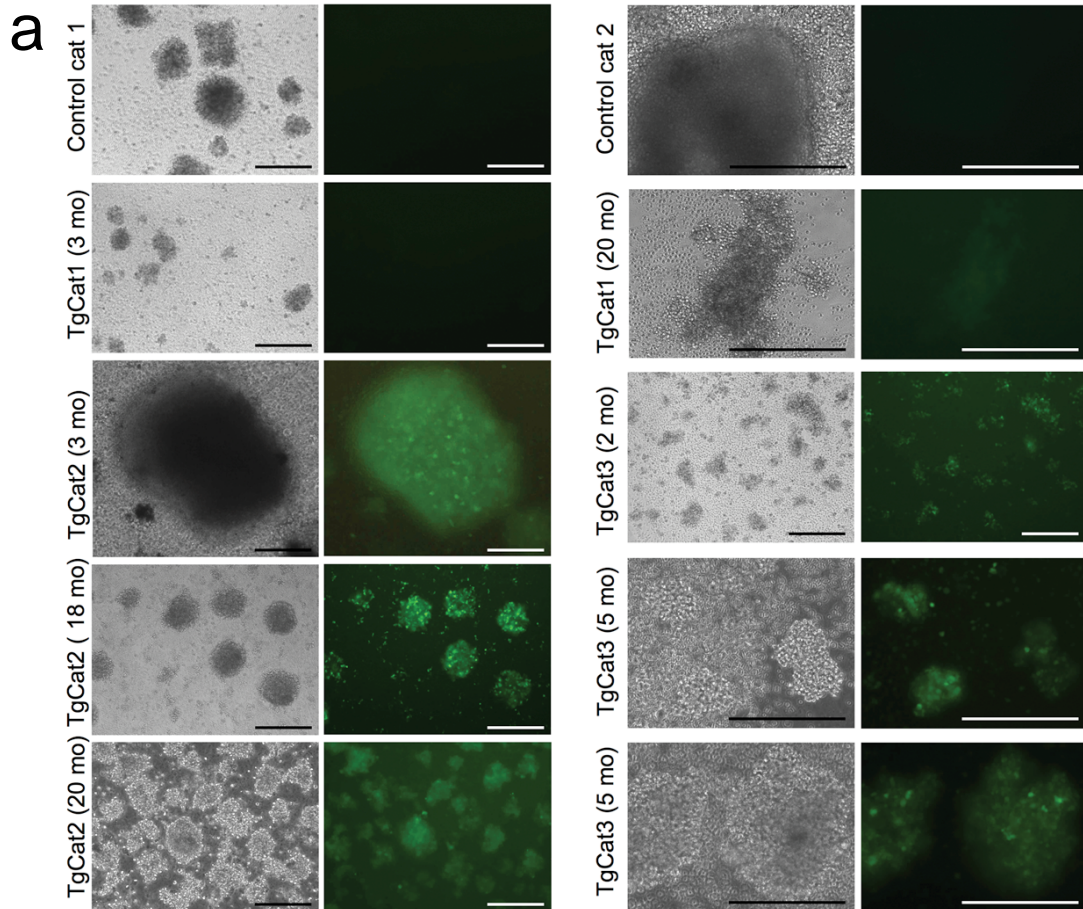

**Supplementary Figure 3. GFP and rhTRIMCyp expression in PBMCs.**

(a) Fluorescence microscopy of PBMCs. Animal ages are shown at left. Small and large size bars represent 500 and 200  $\mu$ m respectively.

(b) rhTRIMCyp; cells are also imaged for GFP and nuclear DNA (DAPI). Immunofluorescence for HA-tagged rhTRIMCyp was done with rat anti-HA. Note that fewer cells expressed detectable TRIMCyp than GFP, and the two proteins were discordant to a large extent, suggesting the mCMV and PGK promoter elements in the vector are differentially active in subsets.

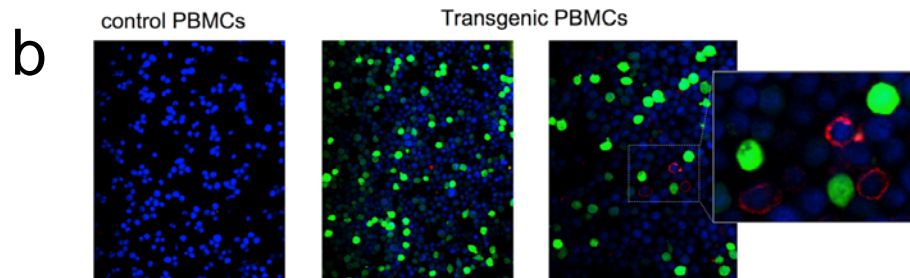

Blue: DAPI  
 Green: GFP (direct epifluorescence)  
 Red: anti-HA labeling HA-tagged rhTRIMCyp



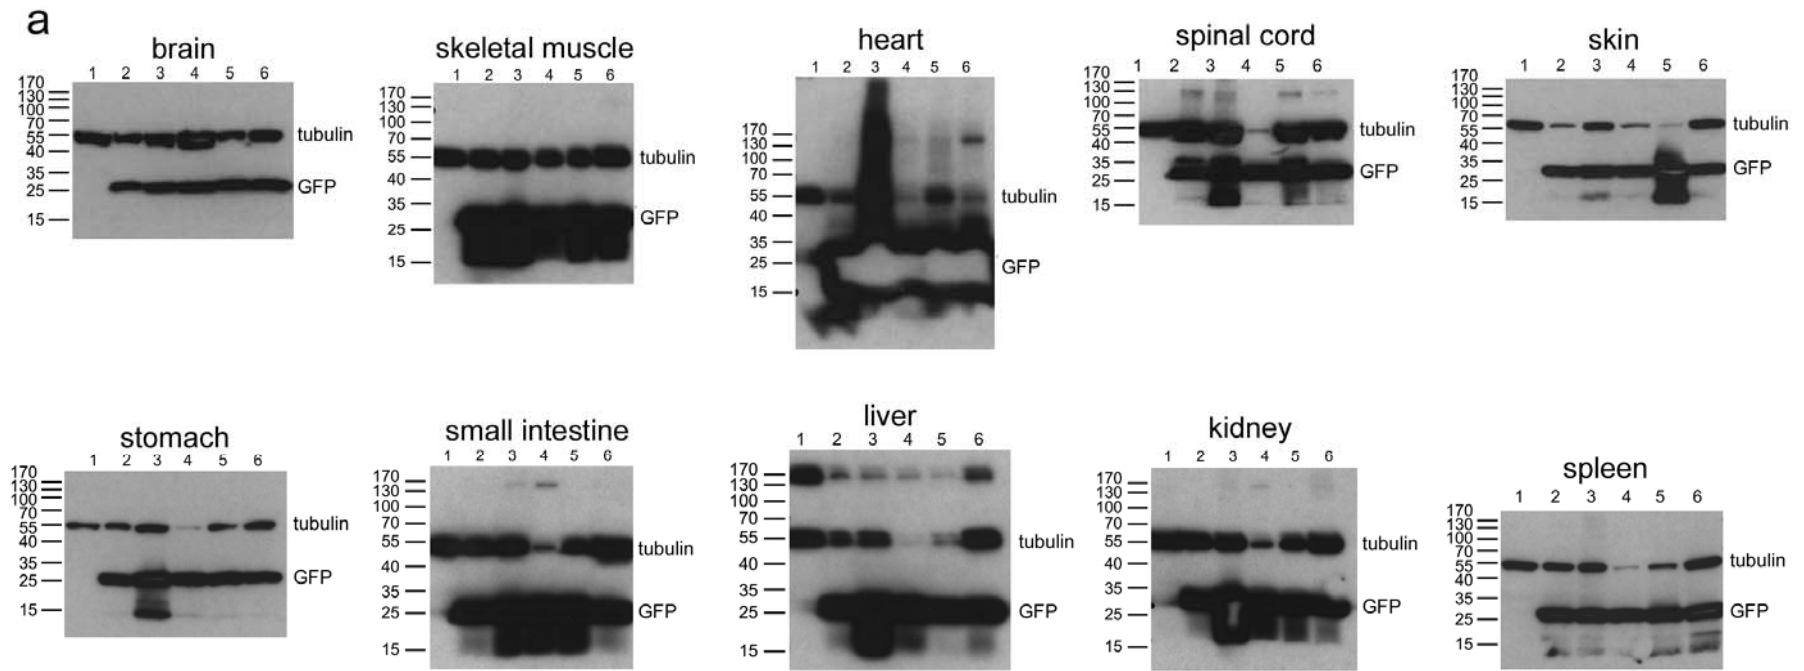

**b**

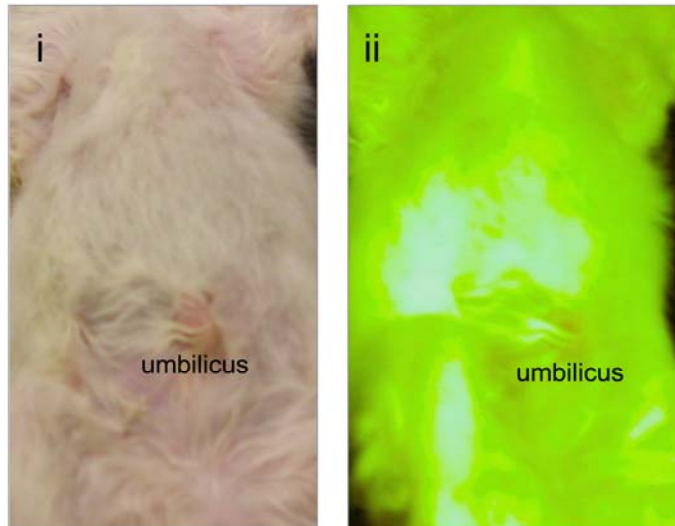

**Supplementary Figure 4. Additional films and images for whole body analyses.** (a) Uncropped versions (full films) of the immunoblots shown in Fig 5a. (b) Integument (ventral aspect of chest and abdomen) of TgCat4 photographed under (i) ambient light and (ii) blue light illumination for GFP.

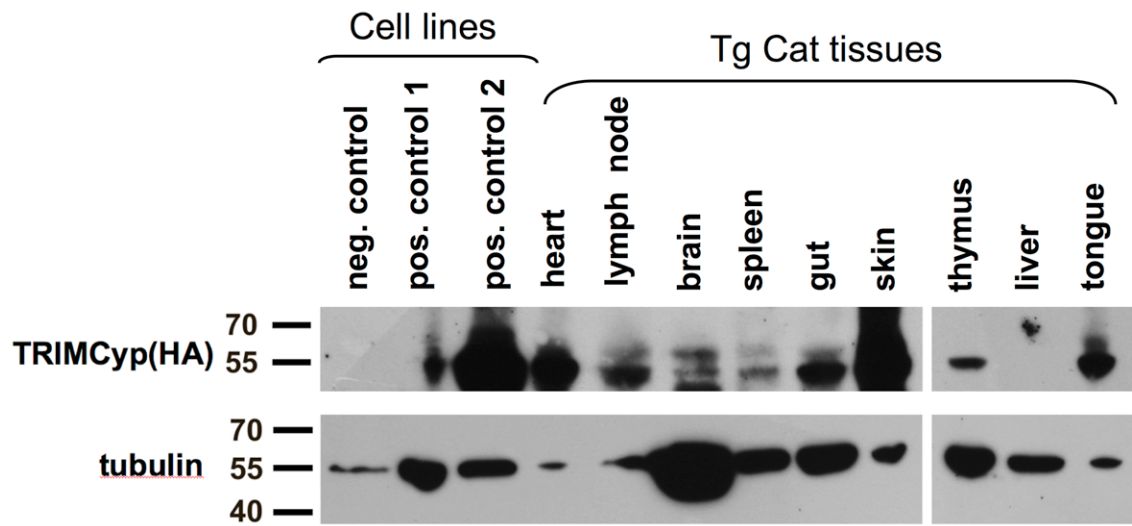

**Supplementary Figure 5. rhTRIMCyp expression in solid organs.** Immunoblotting with anti-HA was performed as in Fig. 3A.



**Supplementary Table 1. Domestic cat embryo cleavage and blastocyst rates, % transgene expression, effect of timing**

| Treatment                            | Number of oocytes | Cleavage rate (%) | Blastocyst rate (%) | Embryo GFP expression (%) | Mosaicism rate |
|--------------------------------------|-------------------|-------------------|---------------------|---------------------------|----------------|
| None                                 | 112               | 65.2 ± 4.2        | 24.3 ± 4.7          | 0                         |                |
| Pre-IVF lentiviral vector injection  | 130               | 59.3 ± 1.8        | 19.8 ± 6.4          | 84.0 ± 11.2               | < 1%           |
| Post-IVF lentiviral vector injection | 165               | 60.7 ± 6.5        | 20.8 ± 6.4          | 78.8 ± 5.3                | 20-30%         |

**Supplementary Table 2. Transgenic embryo development with single vs. dual-gene vectors (all pre-IVF microinjections)**

| Lentiviral vector | Proteins or proteins encoded in vector | Promoter | Number of oocytes | Cleavage rate (%) | Blastocyst rate (%) | Embryo GFP expression (%) |
|-------------------|----------------------------------------|----------|-------------------|-------------------|---------------------|---------------------------|
| TSinG             | GFP                                    | hCMV     | 109               | 62.4 ± 4.7        | 21.0 ± 2.38         | 84.5 ± 10.2               |
| TBDmGpT           | GFP, rhTrimcyp                         | mCMV↔PGK | 204               | 61.6 ± 4.4        | 18.5 ± 5.3          | 88.3 ± 12.0               |
| TBDmGpR           | GFP, RFP                               | mCMV↔PGK | 105               | 66.6 ± 5.3        | 23.6 ± 4.7          | 92.7 ± 9.5                |
| TSinT2AG          | rhTRIMcyp-P2A-GFP                      | hCMV     | nd                | nd                | nd                  | nd                        |

n.d.: not done. hCMV: human cytomegalovirus immediate early gene promoter. mCMV: minimal hCMV promoter.

### Supplementary Table 3. Vector insertion sites

Host - vector junction 1 chrUn\_ACBE01523911: 891-1,138 98.8% Identity  
GGGTCTGTTCTTCCCATGATCTTCTTCCCCTGGGTACTTGATTTCAGTGACTACTTTATAGGAGTTTAGCTG  
AGTTTCCTTCAGTGATTTAGGTTTATGGTGAATGTCTTTAACGTTTATTTATTTTTGGGGGGACAGAGAGA  
GACAGAGCATGAACGGGGGAGGGGCAGAGAGAGAGGGGAGACACAGAATCGGAAACAGGCTCCAGGCTCAGA  
GCCATCAGCCCAGAGCCTGACGCGGGGCTCGAACTTGGAAGGGCTAATTCACTCC

Host - vector junction 2 chrX: 127,955,725-127,956,886 91.3% Identity  
GGGCATCATCAGCAGCACAGTCCTGTAAACGTTCTTGGATGTGGTTGGCACCCGGCCTTTGCTCGGTCAGA  
GTGGGTCAAAGCGGTTCCCTCAGAAGTGAGGGGTGAGGAAACACAGTCACATCTGAGATAAAAAGGAGGGAGG  
TGCTGCCTGGGCTGGTCAATGGACAGTGTAAGTGGGAATGGGTGGAAGCCAGAGACAAAGGATGGGTGC  
GTGATTGCTGGTGGGGGAGAACAGAGTTCCGATACTAGAGACTGGGTAGCTGGGTGACATCATTTTTAATC  
CTCCTGCGCGTGCAGGCACCCACAAGCACCACAACAATCCACCCAGTAAGCTAAGAAGCACCTTCT  
AGTGGAGAACGGAGCCTGAGCCAACCTCACTTTTCATGAACACCACAAGTCTCTGCTGCTTAGTTCAT  
GGACTATAAAGGGCTTCATAGTTTACTTCTATGGGAAAATGATGTAATTTCAATTGTATTTAGTTTGT  
CGCTGGCCCATCTATTAATTTCTTTATCTCTTTTTGTTTTCTTTTTCTTTTGAATACAGAAGATAAA  
AAAAATATTTTTATTTTTAATTTTTATTTAAATTTTTGCTTTAATTTTTTCTACTTTATTTTTTACTTTT  
TTGTAAATTTTATAAATTCTAATTTAATTCATATTTTATCTTATTTTATTGATTTTCAATTTTTTCA  
NATTTTCAAACATTTTACTTTTTTTTATTCTTTTCTTACCTTTCCCTTTTAAATTTTTTTAACATTTATTT  
ATTTTTGAGACAGAGAGAGACAGAGCATGAATGGGGGAGGGGCAGAGAGAGAAGGAGACACAGAATCAGAA  
ACAGTCTCCAGGCTCTGAGCTGTGAGCCAGAGCCTGACGTGGGGCTCGAACTCATGGACCGCGAGATCGT  
GACCTGGCTGAAGTCGGACGCTTAACCGACTGCGCCACCCAGGCGCCCTACCTTTCCCTTTTTAATCTAA  
TCTATAAAGCTCCTTTTTGGAAGGGCTAATTCACTCC

Host - vector junction 3 chrD1: 2,438,470-2,438,540 99.0% Identity  
CCAGTAAGCTAAGCAGCACCATCTAGTGGAGAACGGAGCCATTACACTAAGCCCCCTCGATCTTGGCCTGG  
GCCAACCTCGATCTTCAGGAACACCACATTGGAAGGGCTAATTCACTCC

Host - vector junction 4 chrB1: 21995843 21995941 100% Identity  
CCAGTAAGCTAAGCAGCACCATCTAGTGGAGAACGGAGCCATTACACTAAGCCCCCTCGATCTTGGCCTGG  
GCCAACCTCGATCTTCAGGAACACCACATTGGAAGGGCTAATTCACTCC

Underlined sequences are the U3 terminus of the vector.
